# Supplementary material
Source: Springer Nature journal article supplement (https://www.springermedizin.de/resource/supplementary/12943_2010_1504_MOESM4_ESM.pdf/9554800)

## Centrosome separation and maturation

Separation of centromeres to opposite poles of the cell.

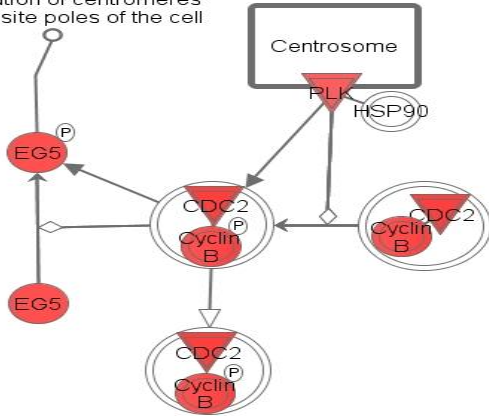

## Mitotic entry

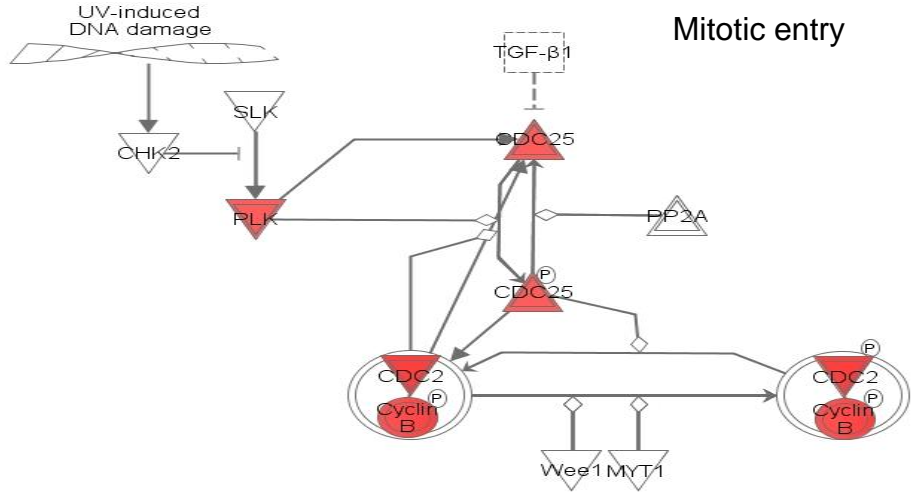

## Septum-inducing network and cytokinesis

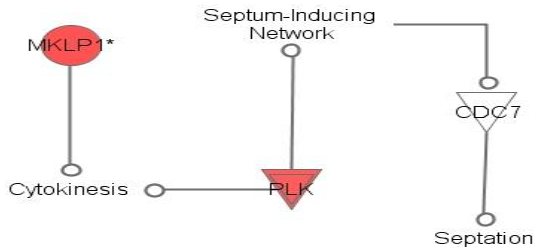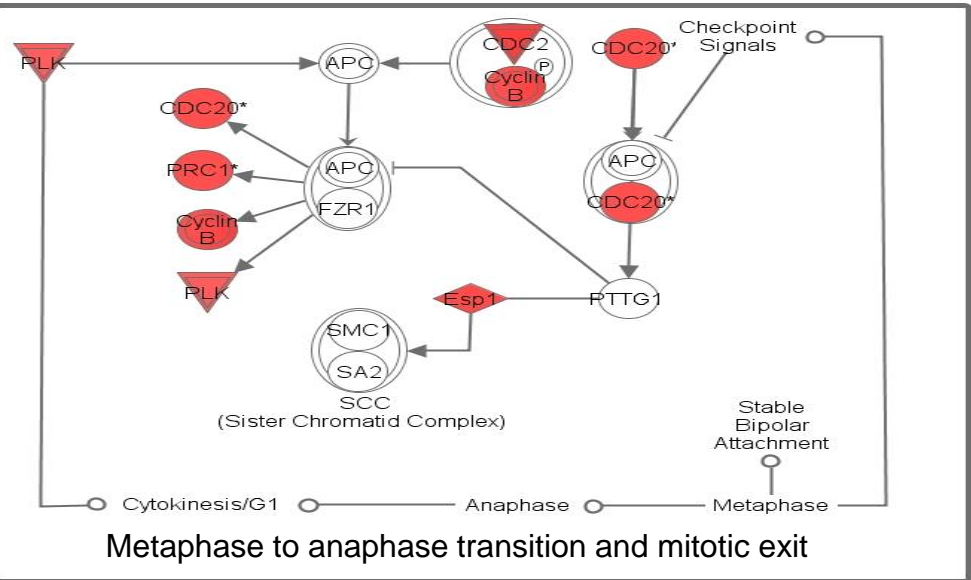

Supplement: MOESM4 [file 9554800]
